# Supplementary material for: Automatic Cancer Cell Taxonomy Using an Ensemble of Deep Neural Networks
Source: MDPI journal article supplement (doi:10.3390/cancers14092224), 2022-04-29

Supplementary Data

Table S1: Pseudo code of the image preprocessing step

|                                                                                               |
|-----------------------------------------------------------------------------------------------|
| Algorithm : Image pre-processing                                                              |
| Input: microscopic image                                                                      |
| Step 1: load data                                                                             |
| Image ← image; {input image with grayscale}                                                   |
| cv ← openCV2; {python library for computer vision task}                                       |
| Step 2: image binarization                                                                    |
| Image ← Image*2; {increase the contrast}                                                      |
| area ← 7; {block size}                                                                        |
| Image ← cv.threshold(Image, threshold); {image binarization}                                  |
| Image ← cv.adaptiveThreshold(Image, area); {local thresholding with area size}                |
| Step 3: noise removal                                                                         |
| kernel ← (2, 2);                                                                              |
| Image ← cv.dilate(Image, kernel); {noise removal with dilation operation using (2, 2) filter} |
| Step 4: find contours and obtain bounding boxes from the pre-processed image                  |
| contours ← cv.findContours; {each contour consists of four coordinates of cells in the image} |
| for each contour in contours do                                                               |
| bbox ← cv.boundingRect(contour);                                                              |
| Step 5: save image patches                                                                    |
| threshold ← 100;                                                                              |
| for each bbox do                                                                              |
| image_size ← width of bbox + height of bbox;                                                  |
| if (image_size) > threshold then {small size cell is excluded}                                |
| save patch;                                                                                   |
| Output: patches of cell image                                                                 |

Table S2: 5-fold cross-validation accuracy of each CNN model with each network configuration. The bold one indicates the winner configuration for each CNN model.

| DenseNet121    |              |              |                                    |                     |
|----------------|--------------|--------------|------------------------------------|---------------------|
| Optimizer      | Lr scheduler | Augmentation | Degree of fine-tuning              | Accuracy (%)        |
| SGD            | O            | O            | All weights                        | 96.798±0.182        |
| <b>SGD</b>     | <b>X</b>     | <b>O</b>     | <b>All weights</b>                 | <b>96.915±0.072</b> |
| SGD            | O            | O            | Freeze the early 25% layers        | 96.004±0.265        |
| SGD            | X            | O            | Freeze the early 25% layers        | 95.901±0.083        |
| SGD            | O            | X            | All weights                        | 94.316±0.213        |
| SGD            | X            | X            | All weights                        | 94.371±0.258        |
| SGD            | O            | X            | Freeze the early 25% layers        | 93.658±0.202        |
| SGD            | X            | X            | Freeze the early 25% layers        | 93.588±0.243        |
| Adagrad        | O            | O            | All weights                        | 96.761±0.232        |
| Adagrad        | X            | O            | All weights                        | 96.868±0.212        |
| Adagrad        | O            | O            | Freeze the early 25% layers        | 96.048±0.269        |
| Adagrad        | X            | O            | Freeze the early 25% layers        | 96.085±0.144        |
| Adagrad        | O            | X            | All weights                        | 94.518±0.264        |
| Adagrad        | X            | X            | All weights                        | 94.342±0.349        |
| Adagrad        | O            | X            | Freeze the early 25% layers        | 93.717±0.189        |
| Adagrad        | X            | X            | Freeze the early 25% layers        | 93.577±0.220        |
| MobileNetV2    |              |              |                                    |                     |
| Optimizer      | Lr scheduler | Augmentation | Degree of fine-tuning              | Accuracy (%)        |
| SGD            | O            | O            | All weights                        | 95.272±0.381        |
| SGD            | X            | O            | All weights                        | 95.287±0.617        |
| <b>SGD</b>     | <b>O</b>     | <b>O</b>     | <b>Freeze the early 25% layers</b> | <b>95.412±0.223</b> |
| SGD            | X            | O            | Freeze the early 25% layers        | 95.276±0.408        |
| SGD            | O            | X            | All weights                        | 92.496±0.381        |
| SGD            | X            | X            | All weights                        | 91.982±0.567        |
| SGD            | O            | X            | Freeze the early 25% layers        | 92.07±0.339         |
| SGD            | X            | X            | Freeze the early 25% layers        | 91.801±0.148        |
| Adagrad        | O            | O            | All weights                        | 94.849±0.261        |
| Adagrad        | X            | O            | All weights                        | 94.757±0.123        |
| Adagrad        | O            | O            | Freeze the early 25% layers        | 94.629±0.285        |
| Adagrad        | X            | O            | Freeze the early 25% layers        | 94.757±0.205        |
| Adagrad        | O            | X            | All weights                        | 91.908±0.28         |
| Adagrad        | X            | X            | All weights                        | 91.588±0.499        |
| Adagrad        | O            | X            | Freeze the early 25% layers        | 91.732±0.332        |
| Adagrad        | X            | X            | Freeze the early 25% layers        | 91.897±0.287        |
| EfficientNetB2 |              |              |                                    |                     |
| Optimizer      | Lr scheduler | Augmentation | Degree of fine-tuning              | Accuracy (%)        |
| SGD            | O            | O            | All weights                        | 95.702±0.385        |
| SGD            | X            | O            | All weights                        | 95.64±0.219         |
| SGD            | O            | O            | Freeze the early 25% layers        | 95.658±0.402        |
| SGD            | X            | O            | Freeze the early 25% layers        | 95.603±0.210        |
| SGD            | O            | X            | All weights                        | 93.949±0.398        |
| SGD            | X            | X            | All weights                        | 94.162±0.341        |
| SGD            | O            | X            | Freeze the early 25% layers        | 94.125±0.433        |
| SGD            | X            | X            | Freeze the early 25% layers        | 94.191±0.331        |
| Adagrad        | O            | O            | All weights                        | 95.96±0.218         |
| <b>Adagrad</b> | <b>X</b>     | <b>O</b>     | <b>All weights</b>                 | <b>96.195±0.23</b>  |
| Adagrad        | O            | O            | Freeze the early 25% layers        | 96.044±0.301        |
| Adagrad        | X            | O            | Freeze the early 25% layers        | 96.085±0.269        |
| Adagrad        | O            | X            | All weights                        | 94.64±0.306         |
| Adagrad        | X            | X            | All weights                        | 94.783±0.279        |
| Adagrad        | O            | X            | Freeze the early 25% layers        | 94.665±0.514        |
| Adagrad        | X            | X            | Freeze the early 25% layers        | 94.813±0.298        |
| InceptionV3    |              |              |                                    |                     |
| Optimizer      | Lr scheduler | Augmentation | Degree of fine-tuning              | Accuracy (%)        |
| <b>SGD</b>     | <b>O</b>     | <b>O</b>     | <b>All weights</b>                 | <b>95.57±0.322</b>  |
| SGD            | X            | O            | All weights                        | 95.515±0.319        |
| SGD            | O            | O            | Freeze the early 25% layers        | 94.077±0.176        |
| SGD            | X            | O            | Freeze the early 25% layers        | 94.088±0.288        |

|                |              |              |                             |                     |
|----------------|--------------|--------------|-----------------------------|---------------------|
| SGD            | O            | X            | All weights                 | 91.658±0.194        |
| SGD            | X            | X            | All weights                 | 91.382±0.343        |
| SGD            | O            | X            | Freeze the early 25% layers | 89.500±0.329        |
| SGD            | X            | X            | Freeze the early 25% layers | 89.438±0.236        |
| Adagrad        | O            | O            | All weights                 | 95.206±0.339        |
| Adagrad        | X            | O            | All weights                 | 95.136±0.324        |
| Adagrad        | O            | O            | Freeze the early 25% layers | 94.114±0.256        |
| Adagrad        | X            | O            | Freeze the early 25% layers | 94.158±0.327        |
| Adagrad        | O            | X            | All weights                 | 91.382±0.353        |
| Adagrad        | X            | X            | All weights                 | 91.349±0.402        |
| Adagrad        | O            | X            | Freeze the early 25% layers | 90.324±0.306        |
| Adagrad        | X            | X            | Freeze the early 25% layers | 90.151±0.375        |
| ResNet50       |              |              |                             |                     |
| Optimizer      | Lr scheduler | Augmentation | Degree of fine-tuning       | Accuracy (%)        |
| SGD            | O            | O            | All weights                 | 96.114±0.177        |
| SGD            | X            | O            | All weights                 | 95.919±0.276        |
| SGD            | O            | O            | Freeze the early 25% layers | 95.794±0.194        |
| SGD            | X            | O            | Freeze the early 25% layers | 95.662±0.219        |
| SGD            | O            | X            | All weights                 | 92.360±0.388        |
| SGD            | X            | X            | All weights                 | 92.118±0.448        |
| SGD            | O            | X            | Freeze the early 25% layers | 92.382±0.441        |
| SGD            | X            | X            | Freeze the early 25% layers | 92.195±0.1          |
| Adagrad        | O            | O            | All weights                 | 96.114±0.192        |
| <b>Adagrad</b> | <b>X</b>     | <b>O</b>     | <b>All weights</b>          | <b>96.265±0.138</b> |
| Adagrad        | O            | O            | Freeze the early 25% layers | 95.996±0.283        |
| Adagrad        | X            | O            | Freeze the early 25% layers | 96.066±0.338        |
| Adagrad        | O            | X            | All weights                 | 93.324±0.184        |
| Adagrad        | X            | X            | All weights                 | 93.228±0.302        |
| Adagrad        | O            | X            | Freeze the early 25% layers | 93.147±0.316        |
| Adagrad        | X            | X            | Freeze the early 25% layers | 93.305±0.355        |

Table S3: Classification accuracy of each single-model ensemble approach

| DenseNet121 |              |               | MobileNetV2 |              |              | EfficientNetB2 |              |               |
|-------------|--------------|---------------|-------------|--------------|--------------|----------------|--------------|---------------|
| Fold        | Ensemble     | Accuracy (%)  | Fold        | Ensemble     | Accuracy (%) | Fold           | Ensemble     | Accuracy (%)  |
| 1           | Top 4        | 97.592        | <b>1</b>    | <b>Top 4</b> | <b>96.71</b> | 1              | Top 4        | 96.857        |
| 1           | Top 8        | 97.371        | 1           | Top 8        | 96.691       | 1              | Top 8        | 96.857        |
| 1           | Top 16       | 96.893        | 1           | Top 16       | 96.213       | 1              | Top 16       | 96.6544118    |
| <b>2</b>    | <b>Top 4</b> | <b>97.813</b> | 2           | Top 4        | 96.691       | 2              | Top 4        | 97.040        |
| 2           | Top 8        | 97.426        | 2           | Top 8        | 96.581       | <b>2</b>       | <b>Top 8</b> | <b>97.188</b> |
| 2           | Top 16       | 97.371        | 2           | Top 16       | 96.158       | 2              | Top 16       | 96.985        |
| 3           | Top 4        | 97.757        | 3           | Top 4        | 96.618       | 3              | Top 4        | 96.526        |
| 3           | Top 8        | 97.371        | 3           | Top 8        | 96.507       | 3              | Top 8        | 96.507        |
| 3           | Top 16       | 97.298        | 3           | Top 16       | 96.342       | 3              | Top 16       | 96.397        |
| 4           | Top 4        | 97.629        | 4           | Top 4        | 96.213       | 4              | Top 4        | 96.618        |
| 4           | Top 8        | 97.5          | 4           | Top 8        | 96.25        | 4              | Top 8        | 96.489        |
| 4           | Top 16       | 97.114        | 4           | Top 16       | 95.643       | 4              | Top 16       | 96.232        |
| 5           | Top 4        | 97.408        | 5           | Top 4        | 96.434       | 5              | Top 4        | 96.746        |
| 5           | Top 8        | 97.39         | 5           | Top 8        | 96.342       | 5              | Top 8        | 96.728        |
| 5           | Top 16       | 97.077        | 5           | Top 16       | 95.588       | 5              | Top 16       | 96.397        |

| InceptionV3 |              |               | ResNet50 |              |               |
|-------------|--------------|---------------|----------|--------------|---------------|
| Fold        | Ensemble     | Accuracy (%)  | Fold     | Ensemble     | Accuracy (%)  |
| 1           | Top 4        | 96.195        | 1        | Top 4        | 96.949        |
| 1           | Top 8        | 96.452        | 1        | Top 8        | 97.022        |
| 1           | Top 16       | 95.680        | 1        | Top 16       | 96.360        |
| <b>2</b>    | <b>Top 4</b> | <b>96.563</b> | 2        | Top 4        | 97.077        |
| 2           | Top 8        | 96.526        | <b>2</b> | <b>Top 8</b> | <b>97.261</b> |
| 2           | Top 16       | 95.919        | 2        | Top 16       | 96.765        |
| 3           | Top 4        | 96.415        | 3        | Top 4        | 97.059        |
| 3           | Top 8        | 96.268        | 3        | Top 8        | 96.930        |
| 3           | Top 16       | 95.441        | 3        | Top 16       | 96.746        |
| 4           | Top 4        | 96.085        | 4        | Top 4        | 96.967        |
| 4           | Top 8        | 96.195        | 4        | Top 8        | 97.022        |
| 4           | Top 16       | 95.239        | 4        | Top 16       | 96.434        |
| 5           | Top 4        | 96.452        | 5        | Top 4        | 96.875        |
| 5           | Top 8        | 96.195        | 5        | Top 8        | 97.096        |
| 5           | Top 16       | 95.588        | 5        | Top 16       | 96.563        |

| Ensemble | Model             |                     |                     |                     |                    |
|----------|-------------------|---------------------|---------------------|---------------------|--------------------|
|          | DenseNet121       | MobileNetV2         | EfficientNetB2      | InceptionV2         | ResNet50           |
| Top 4    | <b>97.64±0.16</b> | <b>96.533±0.209</b> | <b>96.757±0.202</b> | <b>96.342±0.196</b> | 96.985±0.083       |
| Top 8    | 97.412±0.054      | 96.474±0.178        | 96.754±0.287        | 96.327±0.153        | <b>97.066±0.13</b> |
| Top16    | 97.151±0.19       | 95.989±0.348        | 96.533±0.295        | 95.574±0.255        | 96.574±0.181       |

Table S4: Classification accuracy of the multi-model ensemble approach

| Cross ensemble |              |               |
|----------------|--------------|---------------|
| Fold           | Ensemble     | Accuracy (%)  |
| 1              | Top 1        | 97.482        |
| 1              | Top 2        | 97.665        |
| 1              | Top 3        | 97.665        |
| 2              | Top 1        | 97.776        |
| 2              | Top 2        | 97.794        |
| <b>2</b>       | <b>Top 3</b> | <b>97.904</b> |
| 3              | Top 1        | 97.647        |
| 3              | Top 2        | 97.794        |
| 3              | Top 3        | 97.831        |
| 4              | Top 1        | 97.482        |
| 4              | Top 2        | 97.518        |
| 4              | Top 3        | 97.574        |
| 5              | Top 1        | 97.426        |
| 5              | Top 2        | 97.592        |
| 5              | Top 3        | 97.702        |

Figure S1: Confusion matrix of each individual CNN model with the best-performing configuration

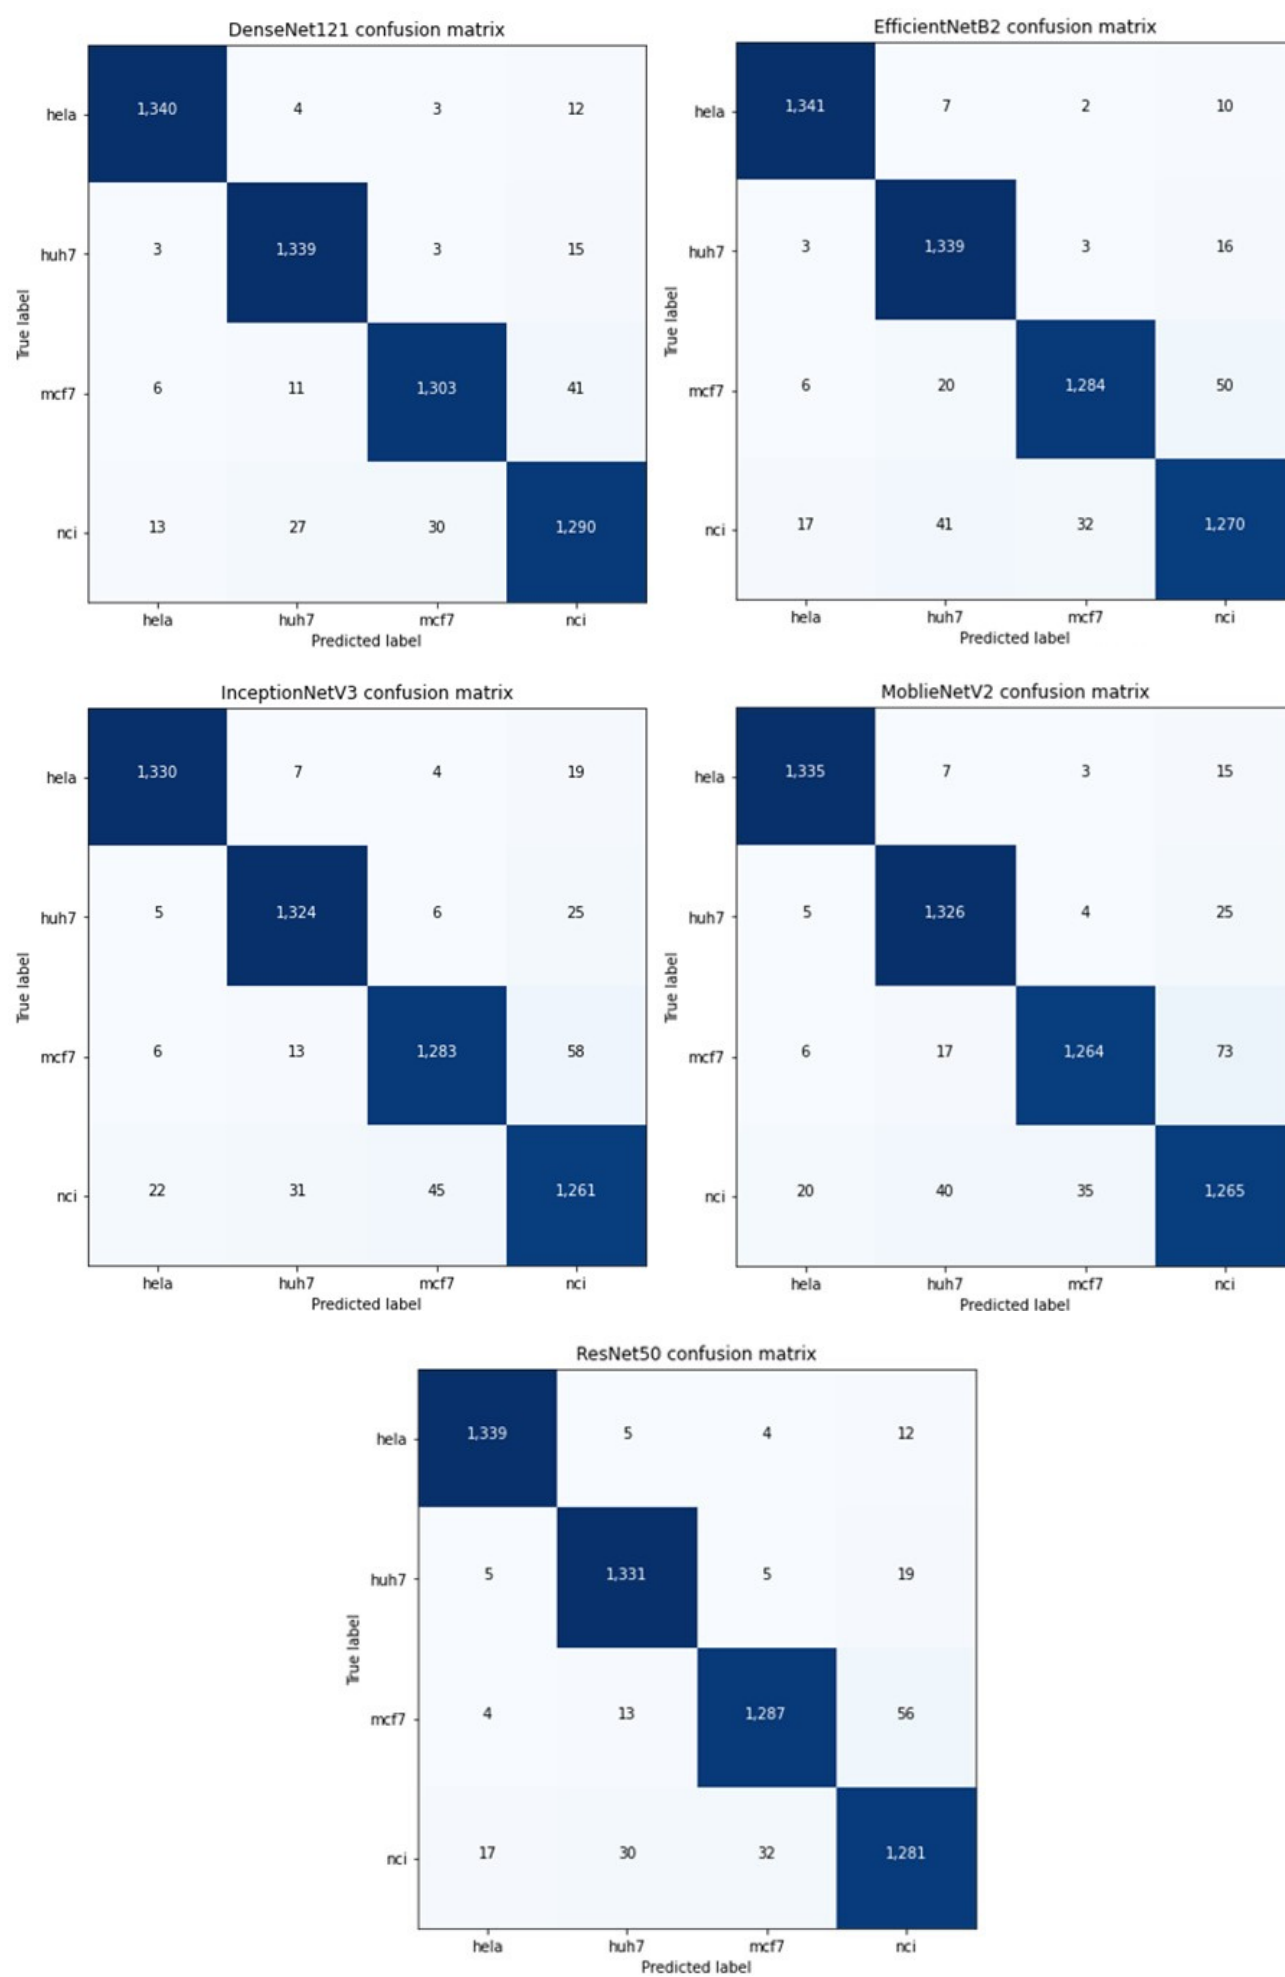

Supplement: s1 [file s1]
